# Supplementary material
Source: MDPI journal article supplement (https://www.mdpi.com/2073-8994/10/1/27)
Supplement: s1 [file s1]

Article

# The Posterior Sustained Negativity Revisited—An SPN Reanalysis of Jacobsen and Höfel (2003)

Thomas Jacobsen \*, Stina Klein and Andreas Löw

Experimental Psychology Unit, Helmut Schmidt University/University of the Federal Armed Forces Hamburg, 22043 Hamburg, Germany; kleins@hsu-hh.de (S.K.); loewa@hsu-hh.de (A.L.)

\* Correspondence: jacobsen@hsu-hh.de; Tel.: +49-40-6541-2863

## Supplementary Material

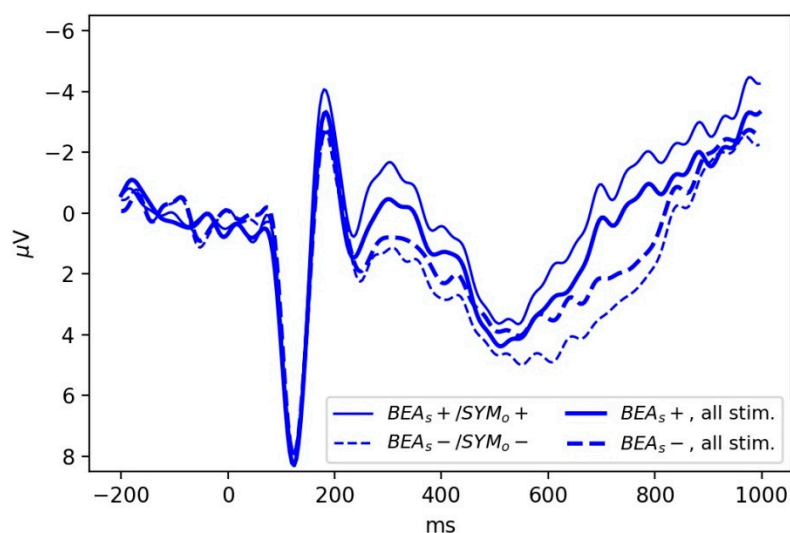

**Figure S1:** ERP waveforms (nose reference, bandpass filtered at 0.2-25 Hz) in the aesthetic task averaged across the sensors P7, O1, O2 and P8 for the stimuli that were subjectively judged either as beautiful ( $BEA_s+$ ) or not ( $BEA_s-$ ). Averages were created for all stimuli or only for those that were objectively symmetric ( $SYM_o+$ ) or not ( $SYM_o-$ ).

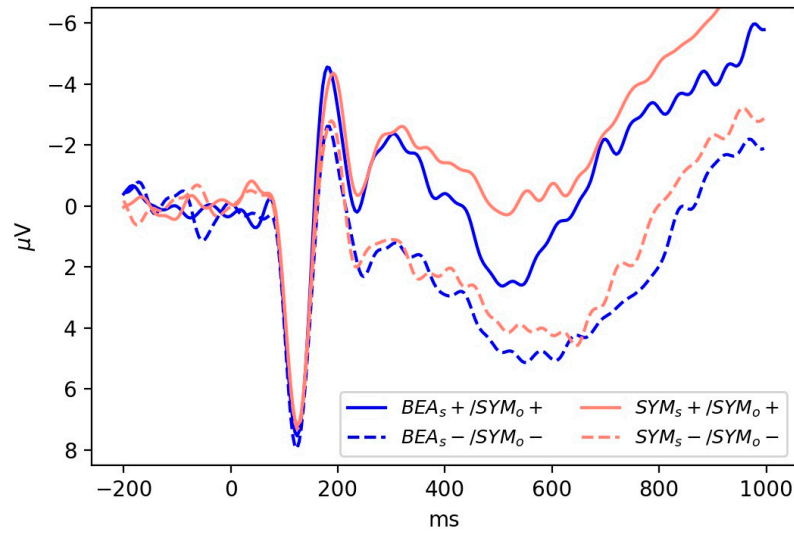

**Figure S2:** ERPs (nose reference, lowpass filter at 25 Hz) for stimuli that were subjectively judged as beautiful ( $BEA_s+$ ), symmetric ( $SYM_s+$ ), not beautiful ( $BEA_s-$ ) or not symmetric ( $SYM_s-$ ) when the objective symmetry was considered. Only objectively symmetric stimuli ( $SYM_o+$ ) were included in the beautiful ( $BEA_s+$ )/symmetric ERPs ( $SYM_s+$ ) and only objectively non-symmetric stimuli ( $SYM_o-$ ) for the not beautiful ( $BEA_s-$ )/not symmetric ERPs ( $SYM_s-$ ).

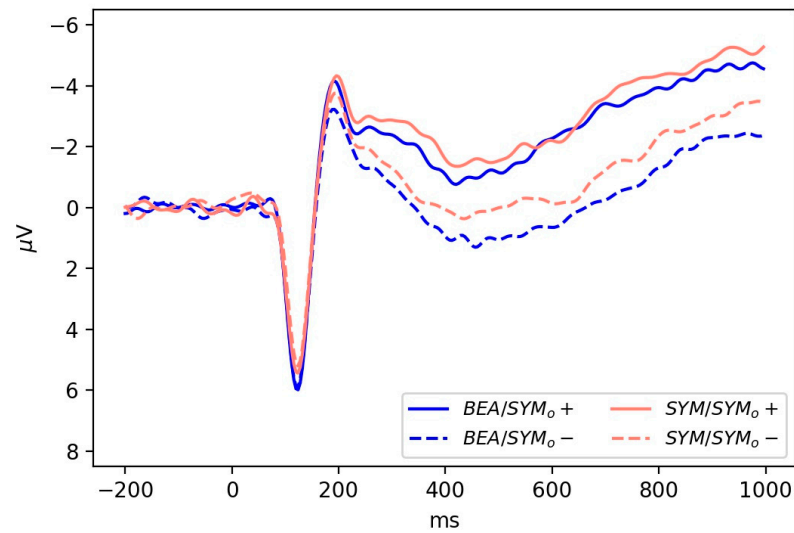

**Figure S3:** ERPs (average reference, lowpass filter at 25 Hz) for objectively symmetric ( $SYM_o+$ ) and non-symmetric ( $SYM_o-$ ) stimuli that were either judged for beauty (BEA; evaluative task) or symmetry (SYM; descriptive task). Participants' responses were disregarded in this analysis.
